# Supplementary material for: Maternal pre-pregnancy BMI influences breast milk composition, infant gut microbiome development, and early-life growth of term infants
Source: Research Square preprint supplement (doi:10.21203/rs.3.rs-6075035/v1), 2025-03-12
Supplement: Supplementary file 1 [file 61e4c66223494257e16cb536.docx]

Supplementary data

“Maternal pre-pregnancy BMI influences breast milk composition, infant gut microbiome development, and early-life growth of term infants”

Rasmus Riemer Jakobsen, Julie Astono, Frederick Børger Beck, Trine Kirk Jacobsen, Katrine O. Poulsen, Rikke A. Larsen, Emma V. Jessen, Chatrine B. Sand, Niels Uldbjerg, Jens Fuglsang, Ulrik K. Sundekilde, Dennis Sandris Nielsen

**Table S1. Anthropometrics and clinical data overview**

| **Variable** | **n** | **Mean** | **n** | **Mean** | **n** | **Mean** | **n** | **Mean** | **Test** |
| --- | --- | --- | --- | --- | --- | --- | --- | --- | --- |
| **Days** | **3** | | **30** | | **60** | | **90** | |  |
| BMI (cm²/kg) | 126 | 27±5.6 | 145 | 27±5.2 | 150 | 27±5.3 | 148 | 27±5.3 | F=0.239 |
| Maternal age (years) | 126 | 31±4.1 | 145 | 31±4 | 150 | 31±4 | 148 | 31±4.1 | F=0.124 |
| Gestational diabetes | 125 |  | 144 |  | 150 |  | 147 |  | χ²=0.374 |
| No | 118 | 94% | 138 | 96% | 142 | 95% | 139 | 95% |  |
| Yes | 7 | 6% | 6 | 4% | 8 | 5% | 8 | 5% |  |
| Siblings | 126 |  | 145 |  | 150 |  | 148 |  | χ²=0.614 |
| No | 52 | 41% | 63 | 43% | 66 | 44% | 68 | 46% |  |
| Yes | 74 | 59% | 82 | 57% | 84 | 56% | 80 | 54% |  |
| Birth mode | 126 |  | 145 |  | 150 |  | 148 |  | χ²=2.209 |
| C-section | 6 | 5% | 13 | 9% | 13 | 9% | 13 | 9% |  |
| Vaginal | 120 | 95% | 132 | 91% | 137 | 91% | 135 | 91% |  |
| Infant sex | 124 |  | 143 |  | 149 |  | 146 |  | χ²=0.401 |
| Female | 67 | 54% | 72 | 50% | 79 | 53% | 77 | 53% |  |
| Male | 57 | 46% | 71 | 50% | 70 | 47% | 69 | 47% |  |
| Gestational age (Days) | 123 | 282±7.9 | 142 | 283±7.7 | 147 | 283±7.2 | 144 | 283±7.5 | F=0.214 |
| Birth weight (kg) | 122 | 3.7±0.48 | 140 | 3.7±0.45 | 146 | 3.7±0.46 | 143 | 3.7±0.46 | F=0.081 |
| Secretor status | 126 |  | 145 |  | 150 |  | 148 |  | χ²=0.62 |
| Non-secretor | 34 | 27% | 34 | 23% | 35 | 23% | 36 | 24% |  |
| Secretor | 92 | 73% | 111 | 77% | 115 | 77% | 112 | 76% |  |
| Lewis status | 126 |  | 145 |  | 150 |  | 148 |  | χ²=0.847 |
| Lewis negative | 6 | 5% | 6 | 4% | 6 | 4% | 4 | 3% |  |
| Lewis positive | 120 | 95% | 139 | 96% | 144 | 96% | 144 | 97% |  |
| Antibiotics mother | 122 |  | 145 |  | 149 |  | 146 |  | χ²=81.1*** |
| No | 121 | 99% | 94 | 65% | 134 | 90% | 136 | 93% |  |
| Yes | 1 | 1% | 51 | 35% | 15 | 10% | 10 | 7% |  |
| Antibiotics infant | 0 |  | 142 |  | 147 |  | 145 |  | χ²=2.829 |
| No | 0 |  | 128 | 90% | 134 | 91% | 138 | 95% |  |
| Yes | 0 |  | 14 | 10% | 13 | 9% | 7 | 5% |  |
| Breast infection | 125 |  | 145 |  | 149 |  | 146 |  | χ²=25.1*** |
| No | 87 | 70% | 103 | 71% | 130 | 87% | 128 | 88% |  |
| Yes | 38 | 30% | 42 | 29% | 19 | 13% | 18 | 12% |  |
| Breastfeeding issues | 125 |  | 145 |  | 149 |  | 146 |  | χ²=16.3** |
| No | 89 | 71% | 99 | 68% | 118 | 79% | 123 | 84% |  |
| No breastfeeding | 1 | 1% | 1 | 1% | 1 | 1% | 3 | 2% |  |
| Yes | 35 | 28% | 45 | 31% | 30 | 20% | 20 | 14% |  |
| Δ BMI (cm²/kg) 3 months | 115 | -0.47±1.2 | 133 | -0.57±1.2 | 142 | -0.61±1.3 | 146 | -0.61±1.2 | F=0.327 |
| Δ HAZ | 101 | 0.28±3.5 | 115 | 0.28±3.3 | 125 | 0.34±3.2 | 126 | 0.39±3.1 | F=0.033 |
| Δ WAZ | 101 | -0.9±0.92 | 115 | -0.99±0.96 | 125 | -0.95±0.93 | 126 | -0.96±0.93 | F=0.159 |
| Δ WHZ | 106 | 0.72±1.6 | 121 | 0.7±1.6 | 132 | 0.66±1.6 | 130 | 0.62±1.5 | F=0.113 |

*Continuous data presented as means ± standard deviation. Categorical data are presented as numbers included in each category. BMI: body mass index, C-section: Caesarean section, GA, n: number.*

**Table S2. Milk metabolites concentrations**

| **Days** | **3** | **30** | **60** | **90** |  |
| --- | --- | --- | --- | --- | --- |
| **Amino acids and derivatives** |  |  |  |  |  |
| Glutamate | 1.1±0.69 | 1.5±0.43 | 1.7±0.45 | 1.8±0.39 | F=57.3*** |
| Urea | 1.3±0.67 | 1.7±0.72 | 1.5±0.66 | 1.6±0.78 | F=5.1*** |
| Glutamine | 0.12±0.16 | 0.49±0.26 | 0.75±0.35 | 0.82±0.4 | F=146.9*** |
| Taurine | 0.5±0.2 | 0.31±0.11 | 0.32±0.16 | 0.33±0.14 | F=45.1*** |
| Alanine | 0.2±0.13 | 0.26±0.077 | 0.27±0.079 | 0.29±0.079 | F=22.9*** |
| Threonine | 0.093±0.064 | 0.099±0.036 | 0.11±0.037 | 0.12±0.038 | F=8.59*** |
| Aspartate | 0.088±0.08 | 0.062±0.033 | 0.085±0.047 | 0.095±0.059 | F=9.7*** |
| Valine | 0.047±0.084 | 0.058±0.017 | 0.063±0.018 | 0.067±0.033 | F=4.7*** |
| Carnitine | 0.055±0.022 | 0.059±0.017 | 0.054±0.017 | 0.049±0.02 | F=6.6*** |
| Betaine | 0.074±0.03 | 0.049±0.013 | 0.047±0.019 | 0.045±0.026 | F=49.1*** |
| Leucine | 0.046±0.18 | 0.031±0.013 | 0.035±0.012 | 0.043±0.04 | F=0.8 |
| Methionine | 0.046±0.021 | 0.03±0.015 | 0.027±0.014 | 0.027±0.015 | F=39.1*** |
| τ-Methylhistidine | 0.027±0.022 | 0.031±0.012 | 0.033±0.013 | 0.034±0.024 | F=3.7** |
| O-Acetylcarnitine | 0.042±0.018 | 0.018±0.008 | 0.019±0.019 | 0.018±0.021 | F=63.5*** |
| Lysine | 0.044±0.065 | 0.013±0.012 | 0.013±0.0067 | 0.018±0.023 | F=24.9*** |
| Tyrosine | 0.021±0.044 | 0.016±0.0073 | 0.016±0.007 | 0.019±0.018 | F=1.58 |
| Phenylalanine | 0.017±0.023 | 0.016±0.0066 | 0.017±0.0057 | 0.018±0.012 | F=0.94 |
| 2-Aminobutyrate | 0.012±0.034 | 0.014±0.0079 | 0.017±0.0073 | 0.018±0.008 | F=3.45** |
| Isoleucine | 0.018±0.053 | 0.01±0.0047 | 0.012±0.0056 | 0.015±0.02 | F=2.06 |
| 2-Hydroxybutyrate | 0.01±0.011 | 0.006±0.0025 | 0.0064±0.0029 | 0.011±0.04 | F=1.96 |
| **Energy related** |  |  |  |  |  |
| Citrate | 5.2±1.6 | 4±0.95 | 3.4±0.79 | 3.1±0.8 | F=100.86*** |
| Lactate | 0.4±0.62 | 0.11±0.22 | 0.12±0.2 | 0.19±0.89 | F=7.263*** |
| Creatine | 0.097±0.038 | 0.061±0.019 | 0.065±0.024 | 0.069±0.043 | F=32.427*** |
| Nicotinamide ribotide | 0.013±0.032 | 0.087±0.029 | 0.076±0.026 | 0.068±0.035 | F=150.556*** |
| Creatinine | 0.056±0.013 | 0.062±0.017 | 0.059±0.016 | 0.058±0.045 | F=1.086 |
| 2-Oxoglutarate | 0.064±0.03 | 0.04±0.012 | 0.049±0.017 | 0.056±0.028 | F=29.355*** |
| Creatine phosphate | 0.032±0.015 | 0.039±0.017 | 0.032±0.017 | 0.026±0.016 | F=17.146*** |
| Formate | 0.011±0.0067 | 0.0072±0.0046 | 0.0073±0.0061 | 0.075±0.58 | F=1.855 |
| Acetone | 0.015±0.012 | 0.015±0.012 | 0.014±0.0083 | 0.018±0.017 | F=2.248* |
| Pyruvate | 0.023±0.019 | 0.0082±0.0046 | 0.011±0.017 | 0.015±0.064 | F=4.558*** |
| Succinate | 0.0099±0.004 | 0.0073±0.0046 | 0.0075±0.0035 | 0.021±0.12 | F=1.681 |
| cis-Aconitate | 0.013±0.0059 | 0.0095±0.0044 | 0.01±0.0063 | 0.0091±0.0098 | F=9.42*** |
| Fumarate | 0.0074±0.0032 | 0.0031±0.0017 | 0.0031±0.002 | 0.0032±0.0021 | F=113.807*** |
| **Fatty acids and derivatives** |  |  |  |  |  |
| O-Phosphocholine | 0.77±0.35 | 0.75±0.15 | 0.56±0.17 | 0.47±0.2 | F=61.017*** |
| sn-Glycero-3-phosphocholine | 0.23±0.25 | 0.56±0.19 | 0.46±0.16 | 0.48±0.19 | F=68.474*** |
| Citicoline | 0.25±0.19 | 0.17±0.086 | 0.26±0.11 | 0.28±0.12 | F=19.259*** |
| Choline | 0.15±0.092 | 0.1±0.048 | 0.14±0.078 | 0.18±0.1 | F=21.967*** |
| Caprylate | 0.048±0.063 | 0.11±0.11 | 0.1±0.12 | 0.13±0.16 | F=9.964*** |
| Ethanolamine | 0.089±0.041 | 0.098±0.025 | 0.096±0.035 | 0.091±0.046 | F=1.379 |
| Caprate | 0.045±0.053 | 0.063±0.055 | 0.071±0.076 | 0.078±0.099 | F=5.018*** |
| Butyrate | 0.024±0.031 | 0.049±0.057 | 0.062±0.081 | 0.094±0.14 | F=14.86*** |
| Acetate | 0.024±0.02 | 0.014±0.024 | 0.012±0.0098 | 0.11±0.74 | F=2.384* |
| **Food derived** |  |  |  |  |  |
| Pantothenate | 0.031±0.034 | 0.025±0.008 | 0.022±0.0087 | 0.021±0.01 | F=9.118*** |
| Hippurate | 0.022±0.018 | 0.014±0.011 | 0.014±0.0094 | 0.013±0.01 | F=16.759*** |
| Caffeine | 0.011±0.0089 | 0.0097±0.0079 | 0.011±0.0099 | 0.012±0.011 | F=1.149 |
| **Microbially derived** |  |  |  |  |  |
| Acetoin | 0.000025±0.00028 | 0.00011±0.0014 | 0±0 | 0.0065±0.059 | F=1.698 |
| **Oligosaccharides** |  |  |  |  |  |
| Unk. HMO 5.11 | 4.4±2.1 | 3.1±1.2 | 3.5±1.3 | 3.4±1.2 | F=19.303*** |
| LNT | 4.8±2.2 | 3.3±1.4 | 2.7±1 | 2.3±1.1 | F=73.981*** |
| 2-Fucosyllactose | 3.8±3 | 2.5±1.8 | 2.2±1.6 | 1.9±1.4 | F=24.371*** |
| 3-Fucosyllactose | 1.4±1.3 | 2.2±1.7 | 2.9±2.2 | 3.4±2.1 | F=29.361*** |
| Unk. HMO 5.10 | 4.7±2.9 | 1.5±1.1 | 1.4±1.4 | 1.1±1.2 | F=124.956*** |
| Unk. HMO 5.09 | 2.2±1 | 2.6±0.85 | 1.7±0.63 | 1.2±0.57 | F=87.764*** |
| Unk. HMO 5.076 | 1.9±0.25 | 1.8±0.2 | 1.6±0.2 | 1.6±0.2 | F=70.534*** |
| Unk. HMO 5.359 | 1.5±0.3 | 1.5±0.35 | 1.5±0.35 | 1.4±0.35 | F=0.219 |
| LNDFH I | 1±0.89 | 0.82±0.62 | 0.67±0.53 | 0.56±0.45 | F=13.909*** |
| Unk. HMO 5.29 | 1±0.89 | 0.59±0.45 | 0.51±0.4 | 0.45±0.37 | F=26.42*** |
| LDFT | 0.54±0.83 | 0.39±0.39 | 0.44±0.54 | 0.45±0.35 | F=1.755 |
| LNnT | 0.81±0.35 | 0.39±0.19 | 0.33±0.21 | 0.32±0.19 | F=126.006*** |
| Unk. HMO 1.70 Sialylated | 1.2±0.52 | 0.37±0.22 | 0.18±0.17 | 0.12±0.087 | F=410.951*** |
| LNDFH II | 0.47±0.5 | 0.41±0.42 | 0.42±0.53 | 0.43±0.5 | F=0.36 |
| LNFP I | 0.6±0.49 | 0.24±0.25 | 0.16±0.18 | 0.12±0.15 | F=78.155*** |
| 6SL partial | 0.5±0.14 | 0.3±0.1 | 0.15±0.071 | 0.096±0.052 | F=495.839*** |
| DSLNT partial | 0.3±0.11 | 0.2±0.07 | 0.14±0.078 | 0.12±0.11 | F=107.907*** |
| 3SL partial | 0.17±0.077 | 0.11±0.032 | 0.11±0.039 | 0.1±0.035 | F=58.405*** |
| **Pharmaceuticals** |  |  |  |  |  |
| Acetaminophen | 0.016±0.026 | 0.0035±0.015 | 0.0014±0.011 | 0.0004±0.0023 | F=27.501*** |
| **Sugars** |  |  |  |  |  |
| Lactose | 203±7 | 214±6.3 | 218±6.9 | 220±7.2 | F=170.502*** |
| myo-Inositol | 2.9±0.52 | 3.2±0.49 | 3.2±0.5 | 3.3±0.46 | F=21.243*** |
| Glucose | 1.3±0.65 | 1.7±0.54 | 1.8±0.6 | 1.8±0.59 | F=23.744*** |
| Galactose | 0.66±0.11 | 0.66±0.099 | 0.68±0.11 | 0.67±0.09 | F=1.046 |
| Fucose | 0.44±0.43 | 0.21±0.14 | 0.24±0.18 | 0.29±0.23 | F=20.422*** |

*Milk metabolites concentrations (mmol/ml), ordered by mean values ± standard deviation. Abbreviations: FL; fucosyllactose, HMOs; human milk oligosaccharides, LDFT; lactodifucotetraose, LNDFH; lacto-N-difucohexaose, LNT; lacto-N-tetraose, SD; standard deviation, SL; Sialyllactose*


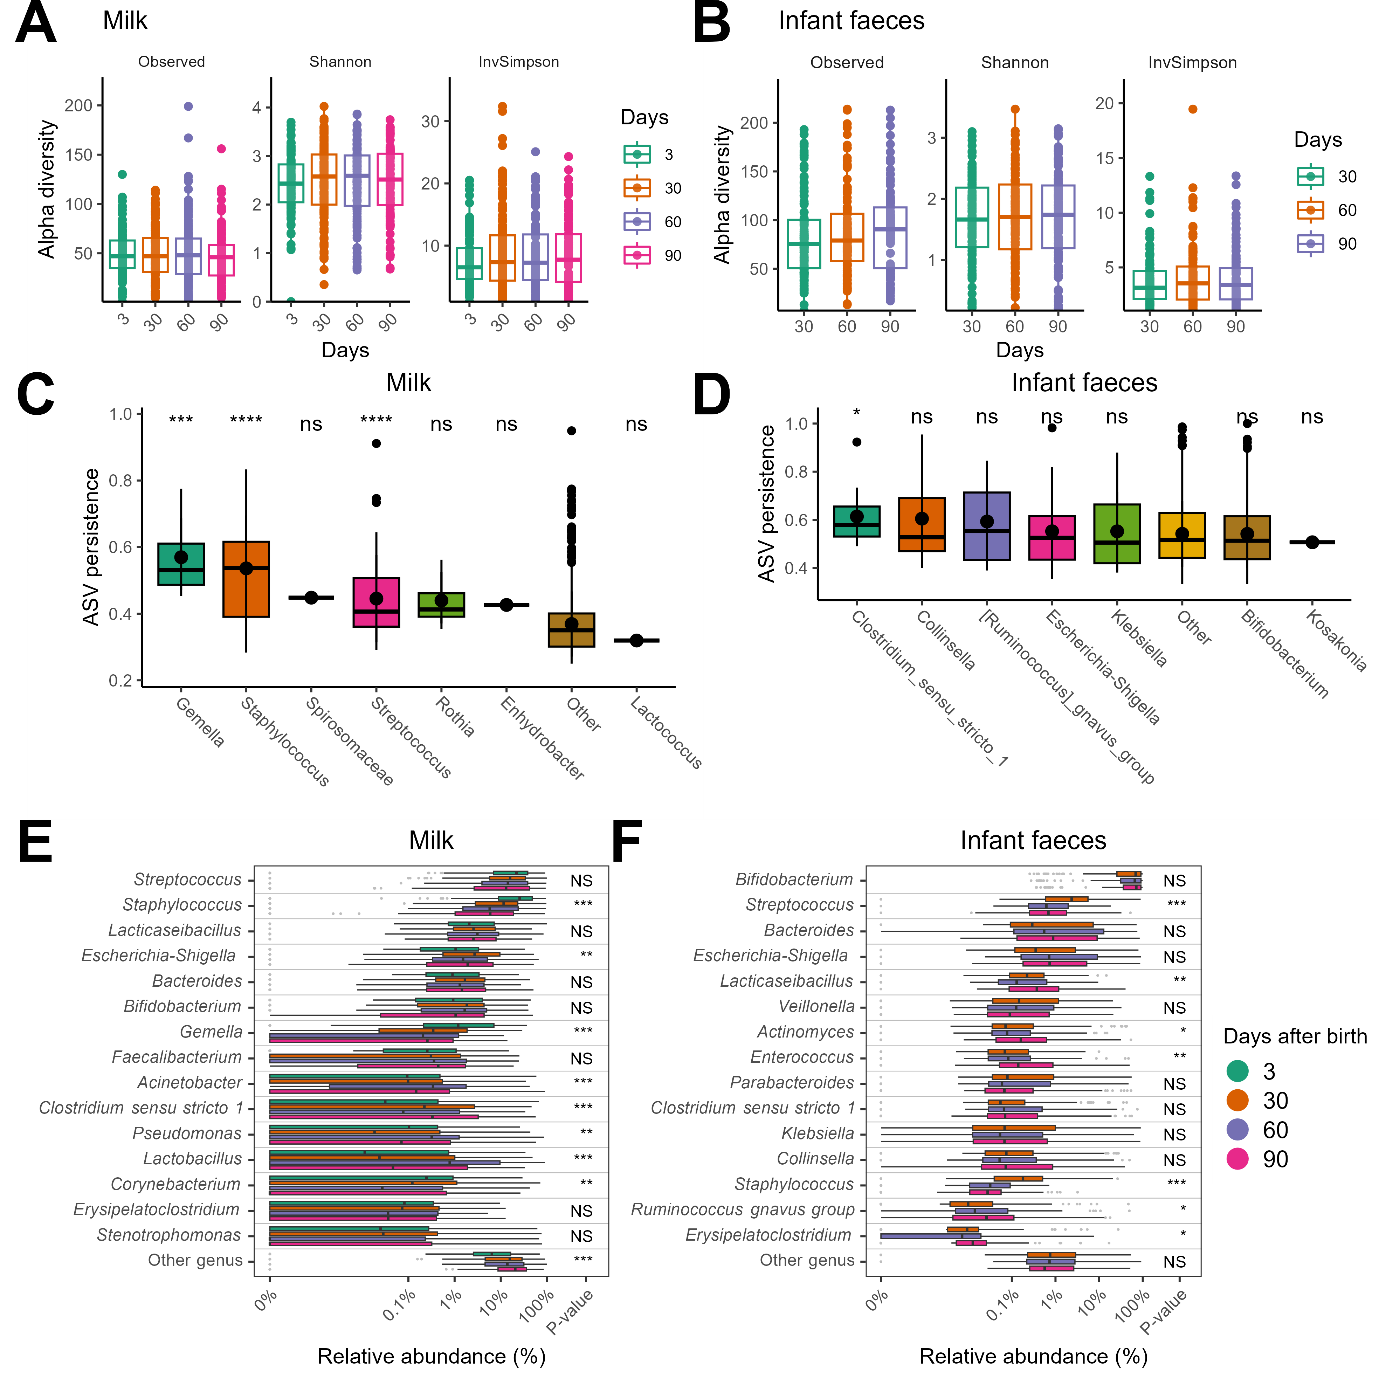


**Figure S1. Bacterial persistence and variability.** *(A, B)**Upset plots of milk infant faecal bacteria showing counts of shared ASVs between each combination of time points. (C, D) Persistence plots for milk and infant faeces summarizing persistence of individual bacterial ASV’s plotting average persistence between time points within individuals, showing the 7 most abundant genera arranged by mean persistence; p-value denotes Wilcoxon test compared to the “Other” category, FDR adjusted. (E, F) Relative abundance boxplots of the 15 most abundant genera by time point, Wilcoxon rank-sum test and FDR corrected (G, H) Milk and infant faecal Alfa diversity by time point, no significant differences detected by ANOVA.*


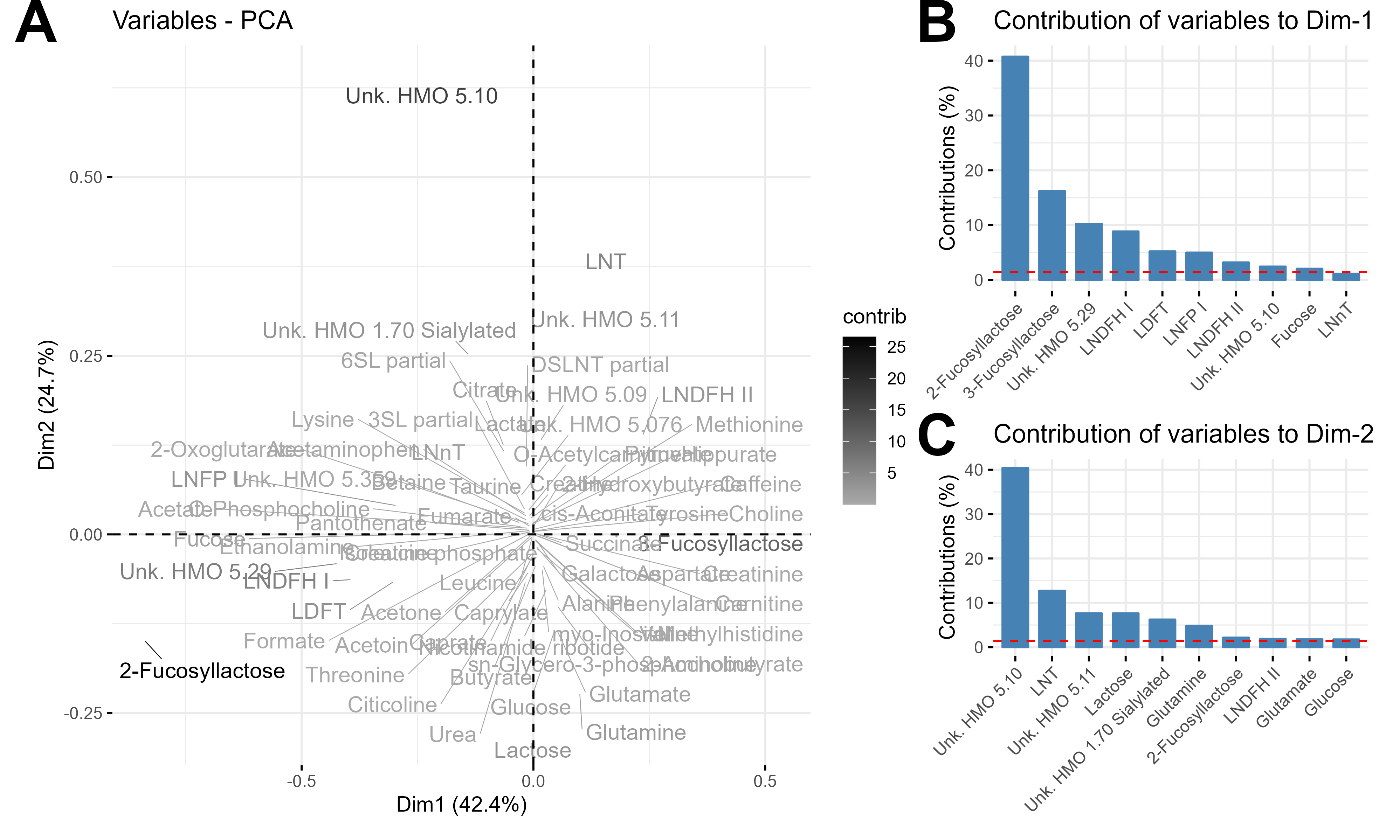


**Figure S2 Contribution of milk metabolites to principal component analysis.** (A) Loadings plot showing coordinates of each metabolites in principal component analysis (PCA), coloured by individual contribution to the principal axes (BC) Variable contributions to principal axes 1 and 2, respectively.
